# Supplementary material for: Relationship between multimorbidity, functional limitation, and quality of life among middle-aged and older adults: findings from the longitudinal analysis of the 2013–2020 Survey of Health, Ageing, and Retirement in Europe (SHARE)
Source: Springer Nature journal article supplement (doi:10.1007/s11136-023-03508-9), 2023-09-30
Supplement: MOESM1 [file 26114148]

## Supplementary Tables

**Table S1:** Descriptive statistics for quality of life, functional limitation, and control variables at baseline by survey response pattern.

|                                  | <i>Time</i>     | All respondents |             |                | Participated in 3 follow-ups |             |                | Did not participate in all follow-ups |             |                | Difference        |
|----------------------------------|-----------------|-----------------|-------------|----------------|------------------------------|-------------|----------------|---------------------------------------|-------------|----------------|-------------------|
|                                  |                 | <i>n</i>        | <i>Mean</i> | <i>Std Dev</i> | <i>n</i>                     | <i>Mean</i> | <i>Std Dev</i> | <i>n</i>                              | <i>Mean</i> | <i>Std Dev</i> | <i>t-test</i>     |
| Quality of life                  | baseline        | 1,500           | 39.7        | 5.5            | 527                          | 40.0        | 5.3            | 973                                   | 39.5        | 5.6            | 1.93              |
| Number of functional limitations | baseline        | 463             | 2.1         | 2.9            | 159                          | 1.2         | 2.0            | 304                                   | 2.6         | 3.2            | 4.98 *            |
|                                  | <i>Category</i> | <i>n</i>        | <i>%</i>    |                | <i>n</i>                     | <i>%</i>    |                | <i>n</i>                              | <i>%</i>    |                | <i>chi-square</i> |
| Any limitations                  | no              | 1,279           | 80.7        |                | 467                          | 86.0        |                | 812                                   | 77.9        |                | 14.95 *           |
|                                  | yes             | 306             | 19.3        |                | 76                           | 14.0        |                | 230                                   | 22.1        |                |                   |
| Gender                           | males           | 747             | 47.1        |                | 244                          | 44.9        |                | 503                                   | 48.3        |                | 1.60              |
|                                  | females         | 838             | 52.9        |                | 299                          | 55.1        |                | 539                                   | 51.7        |                |                   |
| Immigration status               | born in Lux.    | 1,036           | 65.4        |                | 369                          | 68.0        |                | 667                                   | 64.0        |                | 2.45              |
|                                  | immigrant       | 549             | 34.6        |                | 174                          | 32.0        |                | 375                                   | 36.0        |                |                   |
| Having partner                   | no              | 374             | 23.6        |                | 111                          | 20.4        |                | 263                                   | 25.2        |                | 4.56 *            |
|                                  | yes             | 1,211           | 76.4        |                | 432                          | 79.6        |                | 779                                   | 74.8        |                |                   |
| Educational attainment           | high            | 1,221           | 77.0        |                | 400                          | 73.7        |                | 821                                   | 78.8        |                | 5.30 *            |
|                                  | low             | 364             | 23.0        |                | 143                          | 26.3        |                | 221                                   | 21.2        |                |                   |
| Household income                 | 1st quartile    | 317             | 20.0        |                | 99                           | 18.2        |                | 218                                   | 20.9        |                | 3.15              |
|                                  | 2nd quartile    | 317             | 20.0        |                | 107                          | 19.7        |                | 210                                   | 20.1        |                |                   |
|                                  | 3rd quartile    | 318             | 20.1        |                | 105                          | 19.3        |                | 213                                   | 20.4        |                |                   |
|                                  | 4th quartile    | 317             | 20.0        |                | 116                          | 21.4        |                | 201                                   | 19.3        |                |                   |
|                                  | 5th quartile    | 316             | 19.9        |                | 116                          | 21.4        |                | 200                                   | 19.2        |                |                   |

Source: 2013-2020 SHARE data from Luxembourg (n=1,585)

\* Statistically significant change across waves ( $p < 0.05$ )



**Table S2:** Parameter estimates for growth trajectories in quality of life and functional limitation limitations for middle-aged and older adults by multimorbidity status.

| Quality of life                                                 | With multimorbidity |           |                |                 |                 | Without multimorbidity |           |                |                 |                 |
|-----------------------------------------------------------------|---------------------|-----------|----------------|-----------------|-----------------|------------------------|-----------|----------------|-----------------|-----------------|
|                                                                 | Estimate            | SE        | p-value        | Lower CI        | Upper CI        | Estimate               | SE        | p-value        | Lower CI        | Upper CI        |
| <i>Middle age cohort (age 50.0-64.9 at baseline; n=897)</i>     |                     |           |                |                 |                 |                        |           |                |                 |                 |
| Means:                                                          |                     |           |                |                 |                 |                        |           |                |                 |                 |
| QoL_i                                                           | 37.96               | 0.29      | 0.00           | 37.39           | 38.53           | 40.78                  | 0.25      | 0.00           | 40.30           | 41.26           |
| QoL_s                                                           | 0.10                | 0.07      | 0.13           | -0.03           | 0.23            | 0.11                   | 0.05      | 0.02           | 0.02            | 0.20            |
| Variances:                                                      |                     |           |                |                 |                 |                        |           |                |                 |                 |
| QoL_i                                                           | 24.60               | 2.56      | 0.00           | 19.58           | 29.61           | 16.24                  | 1.94      | 0.00           | 12.44           | 20.05           |
| QoL_s                                                           | 0.41                | 0.13      | 0.00           | 0.16            | 0.66            | 0.23                   | 0.07      | 0.00           | 0.09            | 0.38            |
| QoL_s <-> QoL_i                                                 | -0.66               | 0.46      | 0.15           | -1.55           | 0.23            | -1.09                  | 0.31      | 0.00           | -1.70           | -0.47           |
| <i>Older age cohort (Age 65 and older at baseline)</i>          |                     |           |                |                 |                 |                        |           |                |                 |                 |
| Means:                                                          |                     |           |                |                 |                 |                        |           |                |                 |                 |
| QoL_i                                                           | 38.73               | 0.28      | 0.00           | 38.19           | 39.27           | 41.26                  | 0.35      | 0.00           | 40.58           | 41.94           |
| QoL_s                                                           | -0.08               | 0.07      | 0.28           | -0.21           | 0.06            | 0.10                   | 0.08      | 0.19           | -0.05           | 0.25            |
| Variances:                                                      |                     |           |                |                 |                 |                        |           |                |                 |                 |
| QoL_i                                                           | 22.39               | 2.68      | 0.00           | 17.14           | 27.65           | 12.36                  | 2.20      | 0.00           | 8.04            | 16.67           |
| QoL_s                                                           | 0.36                | 0.14      | 0.01           | 0.09            | 0.63            | 0.03                   | 0.13      | 0.80           | -0.22           | 0.29            |
| QoL_s <-> QoL_i                                                 | -0.48               | 0.49      | 0.33           | -1.43           | 0.47            | -0.14                  | 0.42      | 0.74           | -0.97           | 0.68            |
| <b>Functional limitation</b>                                    |                     |           |                |                 |                 |                        |           |                |                 |                 |
|                                                                 | <b>Estimate</b>     | <b>SE</b> | <b>p-value</b> | <b>Lower CI</b> | <b>Upper CI</b> | <b>Estimate</b>        | <b>SE</b> | <b>p-value</b> | <b>Lower CI</b> | <b>Upper CI</b> |
| <i>Middle age cohort (Age 50-64 at baseline)</i>                |                     |           |                |                 |                 |                        |           |                |                 |                 |
| Means:                                                          |                     |           |                |                 |                 |                        |           |                |                 |                 |
| FL_i_r                                                          | —                   | —         | —              | —               | —               | —                      | —         | —              | —               | —               |
| FL_s_r                                                          | -0.42               | 0.12      | 0.00           | -0.67           | -0.18           | -0.53                  | 0.36      | 0.14           | -1.23           | 0.17            |
| FL_i_#                                                          | -2.53               | 0.25      | 0.00           | -3.02           | -2.03           | -3.33                  | 0.38      | 0.00           | -4.07           | -2.58           |
| FL_s_#                                                          | -0.15               | 0.08      | 0.05           | -0.30           | 0.00            | -0.39                  | 0.14      | 0.01           | -0.66           | -0.12           |
| Variances:                                                      |                     |           |                |                 |                 |                        |           |                |                 |                 |
| FL_i_r                                                          | —                   | —         | —              | —               | —               | —                      | —         | —              | —               | —               |
| FL_s_r                                                          | —                   | —         | —              | —               | —               | —                      | —         | —              | —               | —               |
| FL_i_#                                                          | 4.57                | 0.59      | 0.00           | 3.41            | 5.73            | 4.48                   | 0.70      | 0.00           | 3.11            | 5.85            |
| FL_s_#                                                          | 0.03                | 0.01      | 0.00           | 0.01            | 0.05            | 0.02                   | 0.02      | 0.29           | -0.01           | 0.05            |
| covariance (count)                                              | 0.11                | 0.08      | 0.19           | -0.05           | 0.27            | 0.28                   | 0.12      | 0.02           | 0.05            | 0.51            |
| <i>Older age cohort (age 65.0 and older at baseline; n=688)</i> |                     |           |                |                 |                 |                        |           |                |                 |                 |
| Means:                                                          |                     |           |                |                 |                 |                        |           |                |                 |                 |
| FL_i_r                                                          | —                   | —         | —              | —               | —               | —                      | —         | —              | —               | —               |
| FL_s_r                                                          | 0.16                | 0.07      | 0.03           | 0.02            | 0.31            | 0.35                   | 0.11      | 0.00           | 0.13            | 0.58            |
| FL_i_#                                                          | -1.14               | 0.09      | 0.00           | -1.31           | -0.97           | -2.82                  | 0.33      | 0.00           | -3.46           | -2.18           |
| FL_s_#                                                          | 0.14                | 0.03      | 0.00           | 0.09            | 0.19            | 0.24                   | 0.12      | 0.05           | 0.00            | 0.48            |
| Variances:                                                      |                     |           |                |                 |                 |                        |           |                |                 |                 |
| FL_i_r                                                          | —                   | —         | —              | —               | —               | —                      | —         | —              | —               | —               |
| FL_s_r                                                          | —                   | —         | —              | —               | —               | —                      | —         | —              | —               | —               |
| FL_i_#                                                          | 4.29                | 0.23      | 0.00           | 3.85            | 4.73            | 6.82                   | 0.96      | 0.00           | 4.93            | 8.71            |
| FL_s_#                                                          | 0.03                | 0.00      | 0.00           | 0.02            | 0.03            | 0.02                   | 0.01      | 0.00           | 0.01            | 0.04            |
| FL_s_# <-> FL_i_#                                               | -0.05               | 0.04      | 0.23           | -0.14           | 0.03            | -0.10                  | 0.26      | 0.70           | -0.61           | 0.41            |

Source: 2013-2020 SHARE data from Luxembourg (n=1,585)

QoL\_i: Intercept for the latent variable Quality of Life

QoL\_s: Slope for the latent variable Quality of Life

FL\_i\_r: Intercept for the latent variable Risk of Functional Limitation

FL\_s\_r: Slope for the latent variable Risk of Functional Limitation

FL\_i\_#: Intercept for the latent variable Number of Functional Limitations

FL\_s\_#: Slope for the latent variable Number of Functional Limitations

SE: Standard error

CI: 95% confidence interval

**Table S3:** Parameter estimates for the associations between control variables and the growth parameters for middle-aged and older adults by multimorbidity status.

|                                                                 | With multimorbidity |      |         |          |          | Without multimorbidity |      |         |          |          |
|-----------------------------------------------------------------|---------------------|------|---------|----------|----------|------------------------|------|---------|----------|----------|
|                                                                 | Estimate            | SE   | p-value | Lower CI | Upper CI | Estimate               | SE   | p-value | Lower CI | Upper CI |
| <i>Middle age cohort (age 50.0-64.9 at baseline; n=897)</i>     |                     |      |         |          |          |                        |      |         |          |          |
| QoL_i <- FL_i_#                                                 | -1.02               | 0.16 | 0.00    | -1.34    | -0.70    | -0.54                  | 0.17 | 0.00    | -0.86    | -0.21    |
| QoL_s <- FL_s_#                                                 | -3.27               | 3.55 | 0.36    | -10.23   | 3.68     | -1.59                  | 0.66 | 0.02    | -2.89    | -0.29    |
| QoL_s <-> QoL_i                                                 | -0.47               | 0.41 | 0.26    | -1.26    | 0.34     | -0.91                  | 0.30 | 0.00    | -1.50    | -0.31    |
| Means:                                                          |                     |      |         |          |          |                        |      |         |          |          |
| QoL_i                                                           | 34.81               | 0.83 | 0.00    | 33.19    | 36.43    | 37.70                  | 0.96 | 0.00    | 35.82    | 39.58    |
| QoL_s                                                           | 0.17                | 0.23 | 0.46    | -0.29    | 0.63     | -0.19                  | 0.28 | 0.51    | -0.73    | 0.36     |
| FL_i_#                                                          | -2.40               | 0.48 | 0.00    | -3.34    | -1.46    | -3.31                  | 1.03 | 0.00    | -5.32    | -1.29    |
| FL_s_#                                                          | 0.00                | 0.07 | 0.97    | -0.14    | 0.14     | -0.24                  | 0.14 | 0.09    | -0.51    | 0.04     |
| Variances:                                                      |                     |      |         |          |          |                        |      |         |          |          |
| QoL_i                                                           | 17.13               | 2.16 | 0.00    | 12.90    | 21.35    | 13.91                  | 1.72 | 0.00    | 10.54    | 17.27    |
| QoL_s                                                           | 0.18                | 0.28 | 0.52    | -0.37    | 0.73     | 0.08                   | 0.10 | 0.43    | -0.12    | 0.28     |
| FL_i_r                                                          | 4.29                | 0.62 | 0.00    | 3.07     | 5.51     | 4.38                   | 1.08 | 0.00    | 2.27     | 6.50     |
| FL_s_r                                                          | 0.02                | 0.02 | 0.36    | -0.02    | 0.07     | 0.05                   | 0.04 | 0.23    | -0.03    | 0.14     |
| QoL_i <-                                                        |                     |      |         |          |          |                        |      |         |          |          |
| Age                                                             | 0.00                | 0.07 | 0.99    | -0.14    | 0.14     | 0.03                   | 0.06 | 0.64    | -0.09    | 0.15     |
| Gender                                                          | 0.37                | 0.57 | 0.51    | -0.74    | 1.48     | 1.06                   | 0.53 | 0.05    | 0.02     | 2.11     |
| Immigrant                                                       | -1.51               | 0.57 | 0.01    | -2.63    | -0.39    | -1.53                  | 0.53 | 0.00    | -2.57    | -0.50    |
| Education                                                       | 1.22                | 0.67 | 0.07    | -0.09    | 2.54     | 1.15                   | 0.55 | 0.04    | 0.08     | 2.22     |
| Income                                                          | 0.24                | 0.19 | 0.20    | -0.13    | 0.60     | 0.15                   | 0.18 | 0.40    | -0.20    | 0.49     |
| Partner                                                         | 0.73                | 0.59 | 0.22    | -0.43    | 1.88     | 1.19                   | 0.67 | 0.07    | -0.12    | 2.50     |
| QoL_s <-                                                        |                     |      |         |          |          |                        |      |         |          |          |
| Age                                                             | -0.03               | 0.03 | 0.46    | -0.09    | 0.04     | 0.00                   | 0.02 | 0.87    | -0.04    | 0.05     |
| Gender                                                          | -0.29               | 0.22 | 0.20    | -0.73    | 0.15     | -0.35                  | 0.18 | 0.06    | -0.70    | 0.01     |
| Immigrant                                                       | -0.32               | 0.46 | 0.49    | -1.22    | 0.59     | 0.29                   | 0.22 | 0.20    | -0.15    | 0.73     |
| Education                                                       | -0.31               | 0.71 | 0.66    | -1.70    | 1.08     | -0.57                  | 0.32 | 0.08    | -1.19    | 0.06     |
| FL_i_#                                                          |                     |      |         |          |          |                        |      |         |          |          |
| Age                                                             | 0.06                | 0.04 | 0.13    | -0.02    | 0.15     | 0.00                   | 0.06 | 0.98    | -0.12    | 0.12     |
| Gender                                                          | 0.67                | 0.33 | 0.04    | 0.03     | 1.30     | 1.15                   | 0.54 | 0.03    | 0.10     | 2.20     |
| Immigrant                                                       | 0.25                | 0.32 | 0.44    | -0.38    | 0.88     | -0.74                  | 0.49 | 0.13    | -1.70    | 0.22     |
| Education                                                       | -1.05               | 0.48 | 0.03    | -1.99    | -0.11    | -0.05                  | 0.56 | 0.93    | -1.14    | 1.04     |
| Income                                                          | -0.03               | 0.12 | 0.77    | -0.26    | 0.19     | -0.08                  | 0.16 | 0.64    | -0.39    | 0.24     |
| Partner                                                         | -0.75               | 0.35 | 0.03    | -1.44    | -0.06    | -0.46                  | 0.55 | 0.40    | -1.55    | 0.62     |
| FL_s_#                                                          |                     |      |         |          |          |                        |      |         |          |          |
| Age                                                             | 0.00                | 0.01 | 0.79    | -0.02    | 0.02     | 0.01                   | 0.02 | 0.34    | -0.02    | 0.04     |
| Gender                                                          | -0.01               | 0.07 | 0.86    | -0.14    | 0.12     | -0.15                  | 0.14 | 0.27    | -0.42    | 0.12     |
| Immigrant                                                       | -0.14               | 0.07 | 0.07    | -0.28    | 0.01     | 0.09                   | 0.14 | 0.54    | -0.19    | 0.35     |
| Education                                                       | -0.06               | 0.16 | 0.70    | -0.37    | 0.25     | -0.19                  | 0.17 | 0.27    | -0.53    | 0.15     |
| <i>Older age cohort (age 65.0 and older at baseline; n=688)</i> |                     |      |         |          |          |                        |      |         |          |          |
| QoL_i <- FL_i_#                                                 | -1.80               | 0.20 | 0.00    | -2.20    | -1.40    | -1.23                  | 0.28 | 0.00    | -1.77    | -0.69    |
| QoL_s <- FL_s_#                                                 | -2.02               | 0.80 | 0.01    | -3.59    | -0.46    | -1.65                  | 1.10 | 0.13    | -3.82    | 0.51     |
| QoL_s <-> QoL_i                                                 | -0.29               | 0.42 | 0.49    | -1.10    | 0.53     | -0.05                  | 0.35 | 0.90    | -0.74    | 0.65     |
| Means:                                                          |                     |      |         |          |          |                        |      |         |          |          |
| QoL_i                                                           | 36.40               | 0.66 | 0.00    | 35.10    | 37.69    | 36.73                  | 1.11 | 0.00    | 34.56    | 38.90    |
| QoL_s                                                           | -0.10               | 0.19 | 0.59    | -0.47    | 0.27     | 0.55                   | 0.52 | 0.29    | -0.46    | 1.56     |
| FL_i_#                                                          | -0.73               | 0.29 | 0.01    | -1.29    | -0.17    | -2.85                  | 0.62 | 0.00    | -4.06    | -1.64    |
| FL_s_#                                                          | 0.12                | 0.05 | 0.03    | 0.01     | 0.22     | 0.28                   | 0.19 | 0.14    | -0.09    | 0.66     |
| Variances:                                                      |                     |      |         |          |          |                        |      |         |          |          |
| QoL_i                                                           | 13.96               | 2.27 | 0.00    | 9.51     | 18.41    | 6.35                   | 1.90 | 0.00    | 2.63     | 10.07    |
| QoL_s                                                           | 0.13                | 0.15 | 0.38    | -0.16    | 0.42     | -0.11                  | 0.19 | 0.57    | -0.47    | 0.26     |
| FL_i_#                                                          | 2.40                | 0.32 | 0.00    | 1.78     | 3.03     | 3.10                   | 0.99 | 0.00    | 1.16     | 5.05     |
| FL_s_#                                                          | 0.03                | 0.01 | 0.01    | 0.01     | 0.06     | 0.08                   | 0.05 | 0.14    | -0.03    | 0.18     |
| QoL_i <-                                                        |                     |      |         |          |          |                        |      |         |          |          |
| Age                                                             | 0.17                | 0.04 | 0.00    | 0.09     | 0.26     | 0.13                   | 0.07 | 0.05    | 0.00     | 0.26     |
| Gender                                                          | 0.65                | 0.54 | 0.23    | -0.41    | 1.71     | 1.11                   | 0.82 | 0.18    | -0.50    | 2.72     |
| Immigrant                                                       | -1.38               | 0.65 | 0.04    | -2.65    | -0.10    | -0.35                  | 0.88 | 0.69    | -2.07    | 1.38     |
| Education                                                       | 0.44                | 0.71 | 0.54    | -0.95    | 1.82     | 0.65                   | 1.04 | 0.53    | -1.39    | 2.69     |
| Income                                                          | -0.19               | 0.18 | 0.30    | -0.54    | 0.16     | 0.14                   | 0.28 | 0.63    | -0.42    | 0.69     |
| Partner                                                         | 0.81                | 0.53 | 0.12    | -0.22    | 1.84     | 1.03                   | 0.78 | 0.19    | -0.49    | 2.55     |
| QoL_s <-                                                        |                     |      |         |          |          |                        |      |         |          |          |
| Age                                                             | -0.01               | 0.02 | 0.39    | -0.04    | 0.02     | 0.02                   | 0.02 | 0.32    | -0.02    | 0.06     |
| Gender                                                          | 0.08                | 0.15 | 0.61    | -0.21    | 0.36     | -0.23                  | 0.34 | 0.50    | -0.89    | 0.43     |
| Immigrant                                                       | 0.00                | 0.17 | 0.99    | -0.34    | 0.34     | -0.23                  | 0.38 | 0.54    | -0.97    | 0.51     |
| Education                                                       | 0.00                | 0.21 | 0.99    | -0.41    | 0.40     | -0.72                  | 0.48 | 0.14    | -1.66    | 0.23     |
| FL_i_#                                                          |                     |      |         |          |          |                        |      |         |          |          |
| Age                                                             | 0.11                | 0.01 | 0.00    | 0.08     | 0.13     | 0.18                   | 0.03 | 0.00    | 0.12     | 0.24     |
| Gender                                                          | 0.20                | 0.23 | 0.39    | -0.26    | 0.65     | 0.43                   | 0.51 | 0.40    | -0.56    | 1.42     |
| Immigrant                                                       | -0.11               | 0.26 | 0.67    | -0.63    | 0.40     | 0.13                   | 0.65 | 0.84    | -1.14    | 1.39     |
| Education                                                       | -0.44               | 0.36 | 0.23    | -1.15    | 0.28     | -0.16                  | 0.67 | 0.81    | -1.49    | 1.16     |
| Income                                                          | -0.22               | 0.07 | 0.00    | -0.36    | -0.08    | -0.26                  | 0.18 | 0.14    | -0.60    | 0.09     |
| Partner                                                         | -0.44               | 0.22 | 0.04    | -0.86    | -0.01    | -0.11                  | 0.49 | 0.82    | -1.06    | 0.84     |
| FL_s_#                                                          |                     |      |         |          |          |                        |      |         |          |          |
| Age                                                             | 0.01                | 0.00 | 0.00    | 0.01     | 0.02     | 0.01                   | 0.01 | 0.42    | -0.01    | 0.03     |
| Gender                                                          | -0.06               | 0.05 | 0.23    | -0.17    | 0.04     | -0.17                  | 0.16 | 0.27    | -0.48    | 0.13     |
| Immigrant                                                       | 0.03                | 0.07 | 0.61    | -0.10    | 0.16     | -0.04                  | 0.24 | 0.87    | -0.51    | 0.43     |
| Education                                                       | -0.06               | 0.09 | 0.53    | -0.23    | 0.12     | -0.39                  | 0.22 | 0.08    | -0.83    | 0.04     |

Source: 2013-2020 SHARE data from Luxembourg (n=1,585)

QoL\_i: Intercept for the latent variable Quality of Life

QoL\_s: Slope for the latent variable Quality of Life

FL\_i\_r: Intercept for the latent variable Risk of Functional Limitation

FL\_s\_r: Slope for the latent variable Risk of Functional Limitation

FL\_i\_#: Intercept for the latent variable Number of Functional Limitations

FL\_s\_#: Slope for the latent variable Number of Functional Limitations

SE: Standard error

CI: 95% confidence interval
